# Supplementary material for: Localized incorporation of cesium ions to improve formamidinium lead iodide layers in perovskite solar cells
Source: Royal Society of Chemistry journal article supplement (doi:10.1039/c8ra04742a), 2018-01-01
Supplement: c8ra04742a1.pdf [file c8ra04742a1.pdf]

## Supporting Information

### Localized Incorporation of Cesium Ions for Improving Formamidinium Lead Iodide Layers in Perovskite Solar Cells

Yebin Xue<sup>a</sup>, Jiaqi Tian<sup>a</sup>, Haiyue Wang<sup>a</sup>, Honggang Xie<sup>a</sup>, Shanshan Zhu<sup>a</sup>, Bo Zheng<sup>a</sup>,

Chunxiao Gao<sup>b</sup>, Xizhe Liu<sup>\*a</sup>

*<sup>a</sup>Institute of Atomic and Molecular Physics, Jilin Provincial Key Laboratory of Applied Atomic and Molecular Spectroscopy, Jilin University, Changchun, 130012, China*

*<sup>b</sup>State Key Laboratory for Superhard Materials, Jilin University, Changchun, 130012, China*

*\*Corresponding Author. E-mail address: (L. X.) liu\_xizhe@jlu.edu.cn*

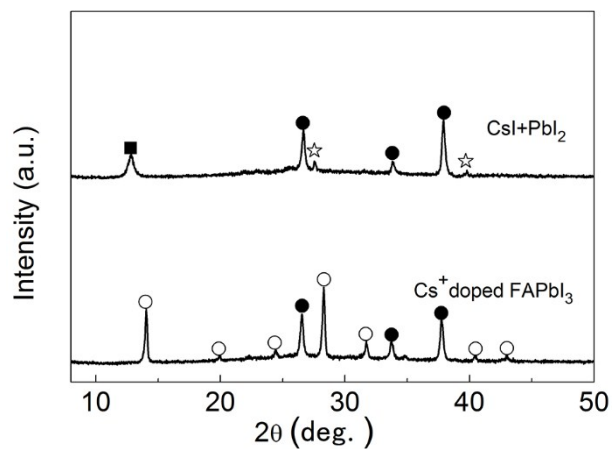

**Fig. S1** X-ray diffraction patterns for the deposition process of mixed solution doping method, diffraction peaks of FTO, CsI,  $\text{PbI}_2$  and  $\alpha\text{-FAPbI}_3$  are labelled with solid circles, open asterisks, solid squares and open circles, respectively.

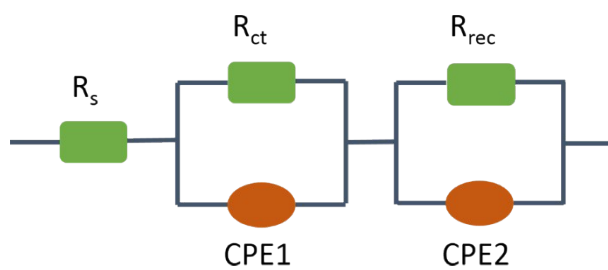

**Fig. S2** The equivalent circuit for fitting impedance spectra.

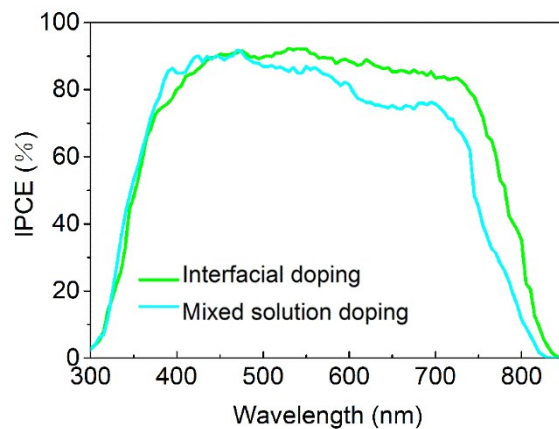

**Fig. S3** The IPCE spectra of  $\text{Cs}_x\text{FA}_{1-x}\text{PbI}_3$  devices fabricated by interfacial doping method and mixed solution doping method.

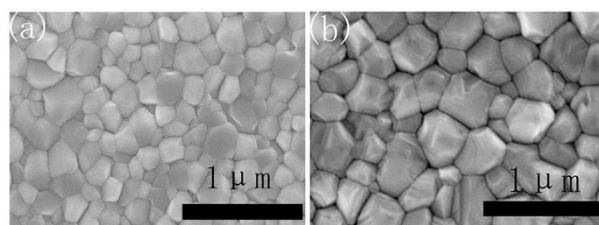

**Fig. S4** The surface morphology of  $\text{Cs}_x\text{FA}_{1-x}\text{PbI}_3$  layers prepared by (a) mixed solution doping method and (b) interfacial doping method.

**Table S1** The photovoltaic parameters of devices prepared by interfacial doping method with different CsI doping layers.

| Devices | $J_{sc}(\text{mAcm}^{-2})$ | $V_{oc}(\text{V})$ | FF   | PCE(%) |
|---------|----------------------------|--------------------|------|--------|
| W/O CsI | 20.1                       | 1.01               | 0.66 | 13.4   |
| CsI50   | 23.0                       | 1.05               | 0.71 | 17.1   |
| CsI100  | 19.5                       | 0.98               | 0.67 | 12.7   |
| CsI200  | 17.1                       | 0.90               | 0.64 | 9.8    |
